# Supplementary material
Source: HighWire-hosted journal article supplement (https://diabetes.diabetesjournals.org/content/suppl/2007/08/23/db07-0697)
Supplement: DB070697OnlineAppenFigs.pdf [file DB070697OnlineAppenFigs.pdf]

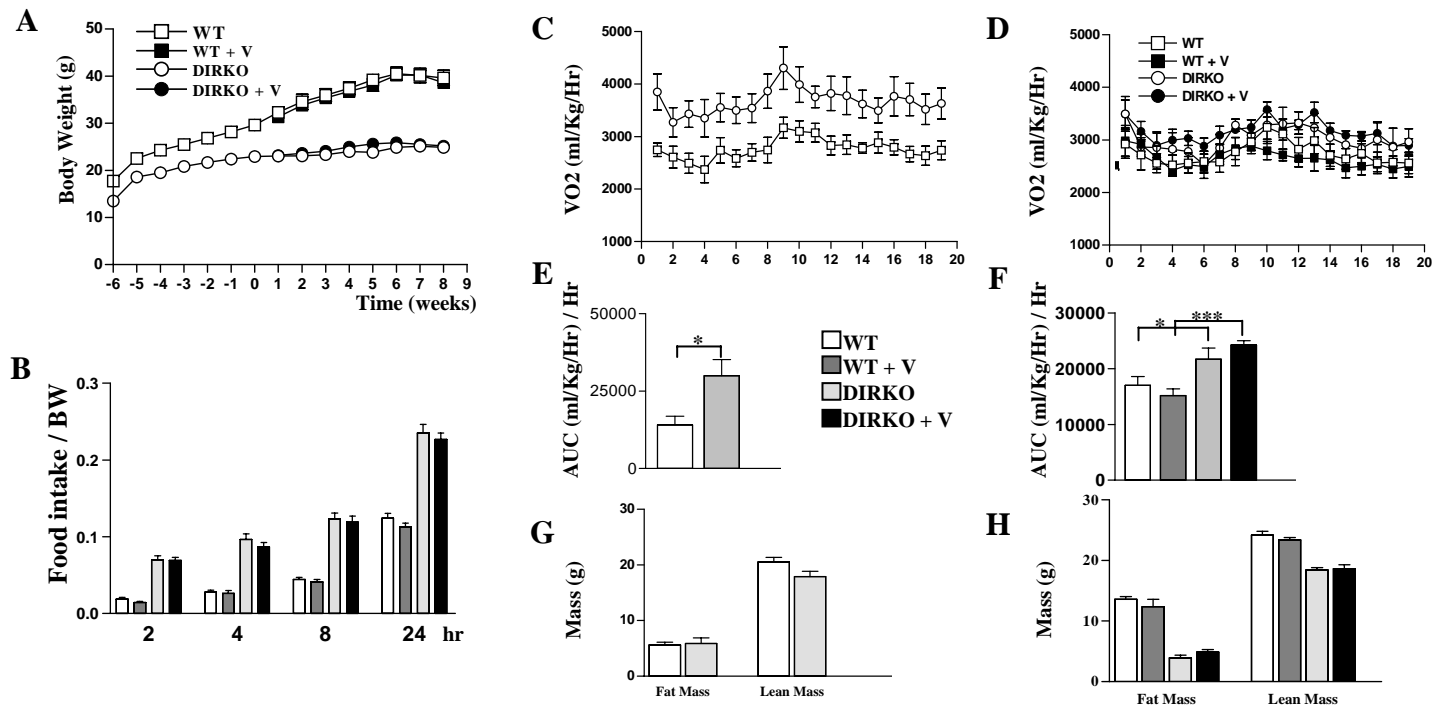

Supplementary Figure 1

**A**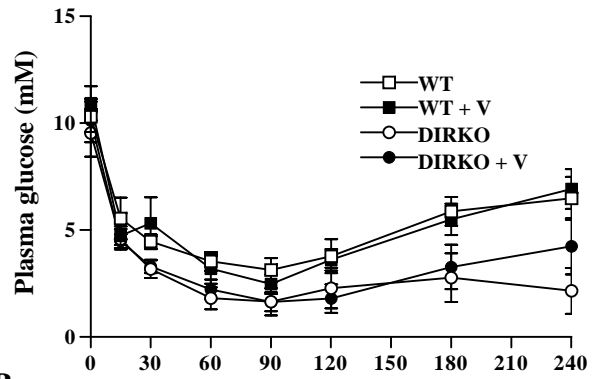**B**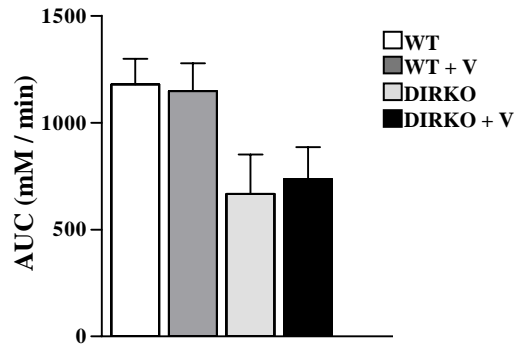

Supplementary Figure 2

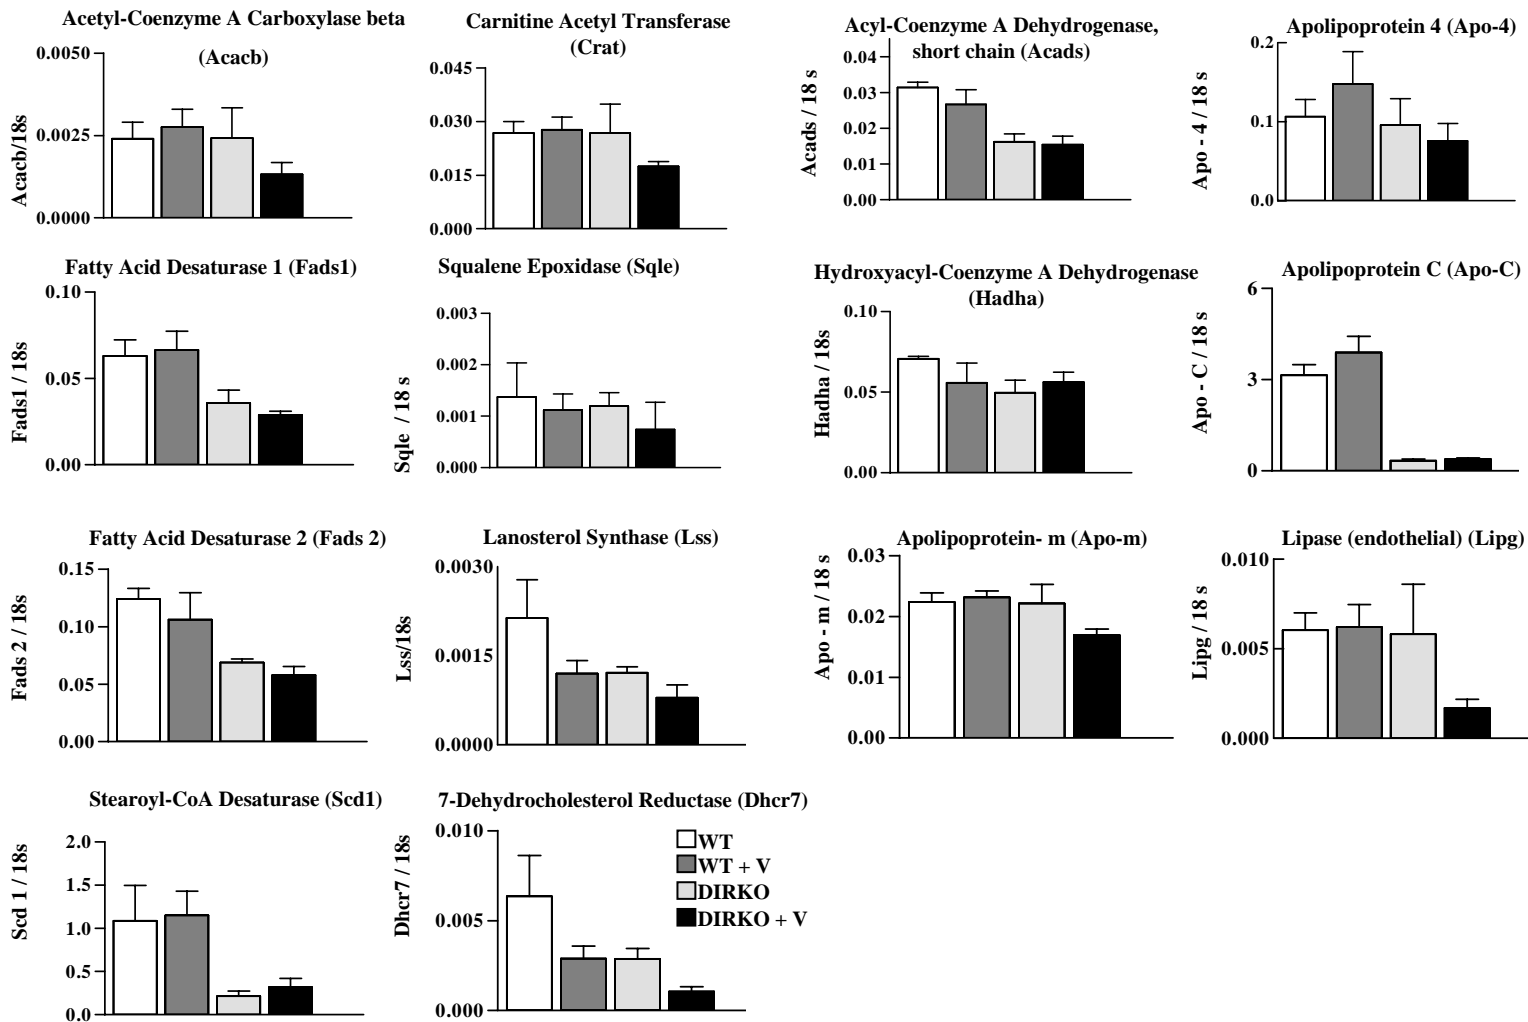

Supplementary Figure 3

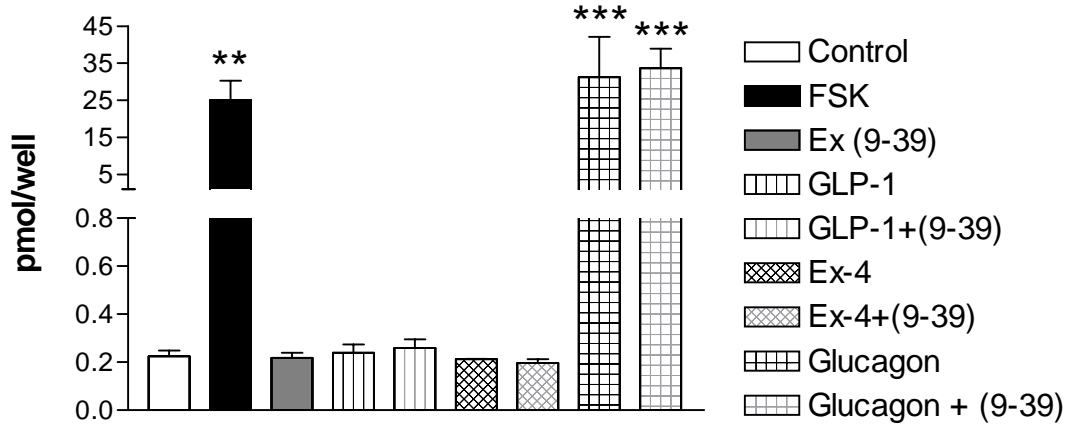

Supplementary Figure 4

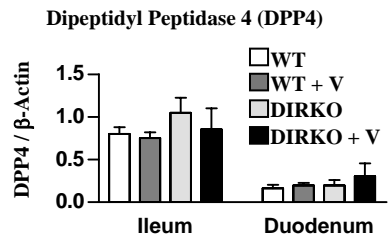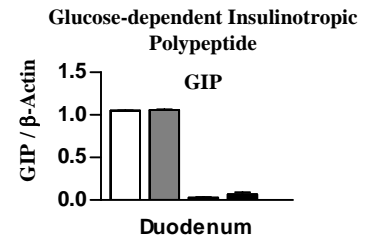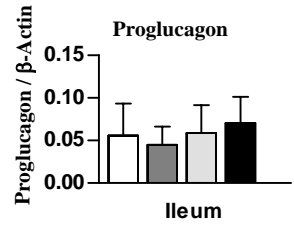

Supplementary Figure 5
